# Supplementary material for: Prognostic value of preoperative lymphocyte-related systemic inflammatory biomarkers in upper tract urothelial carcinoma patients treated with radical nephroureterectomy: a systematic review and meta-analysis
Source: PubMed Central journal article supplement (PMC7585317; doi:10.1186/s12957-020-02048-7), 2020-10-23

## A NLR and OS

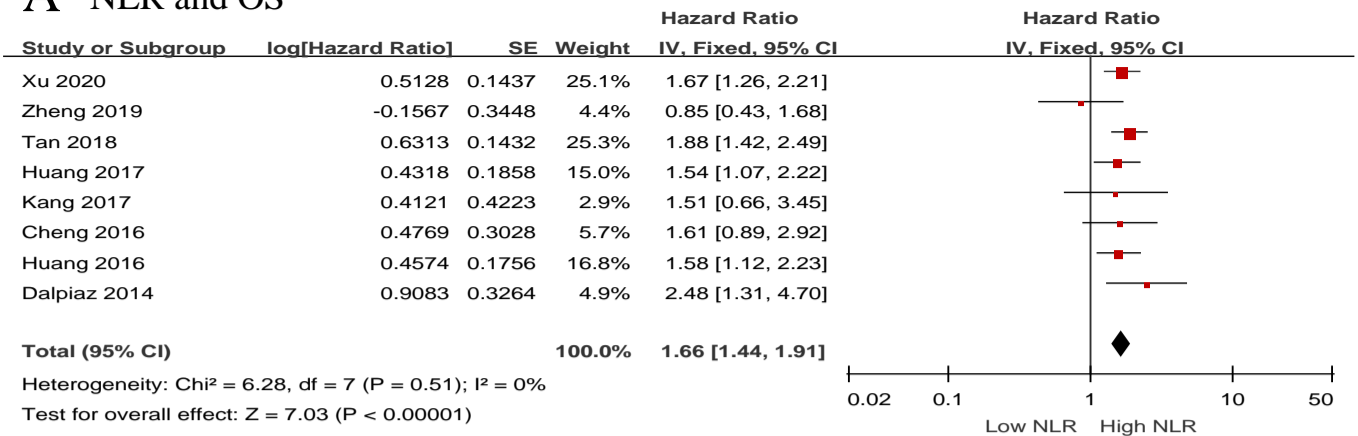

## B NLR and CSS

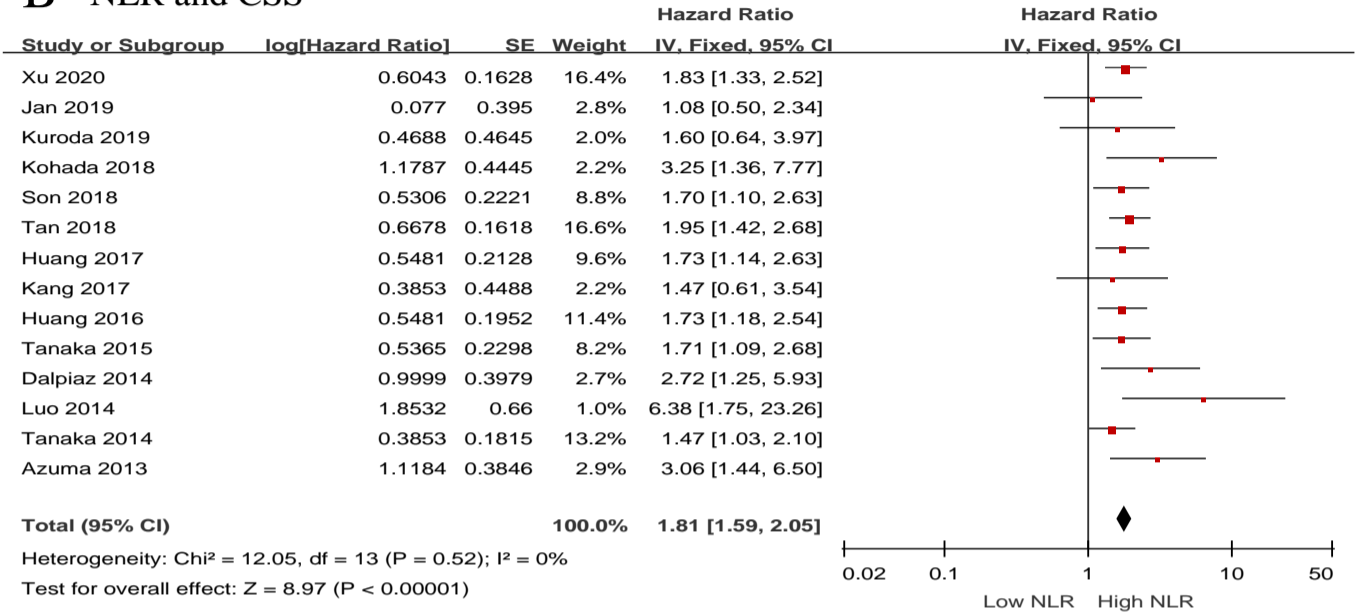

## C NLR and DFS/RFS/MFS

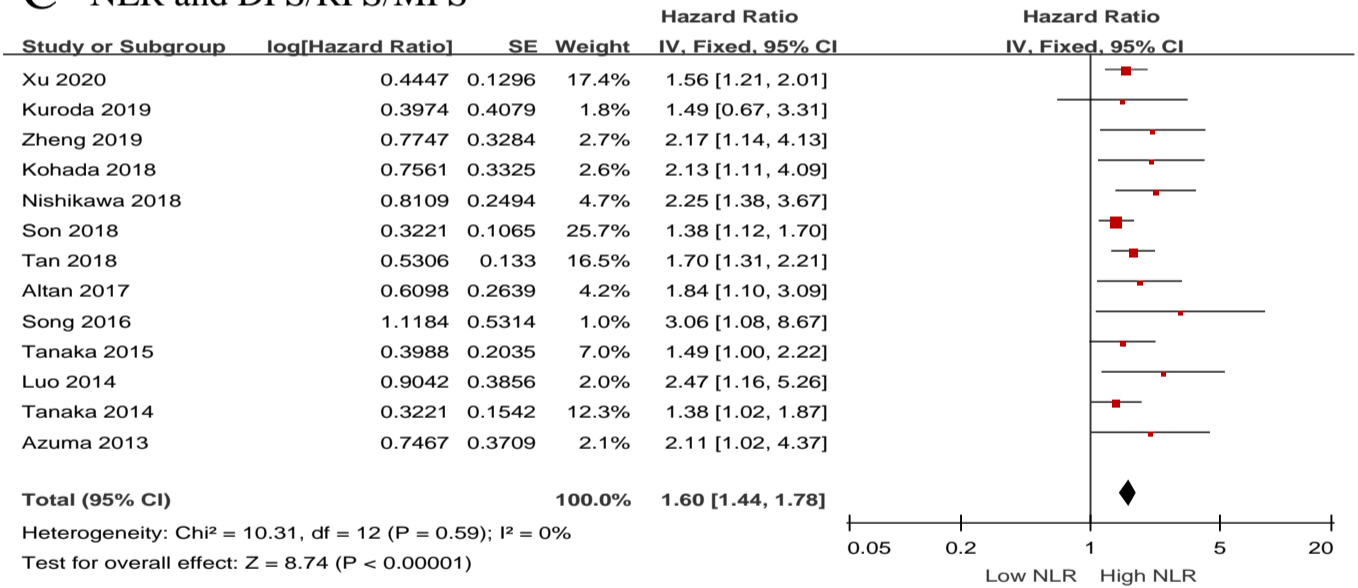

## D NLR and PFS

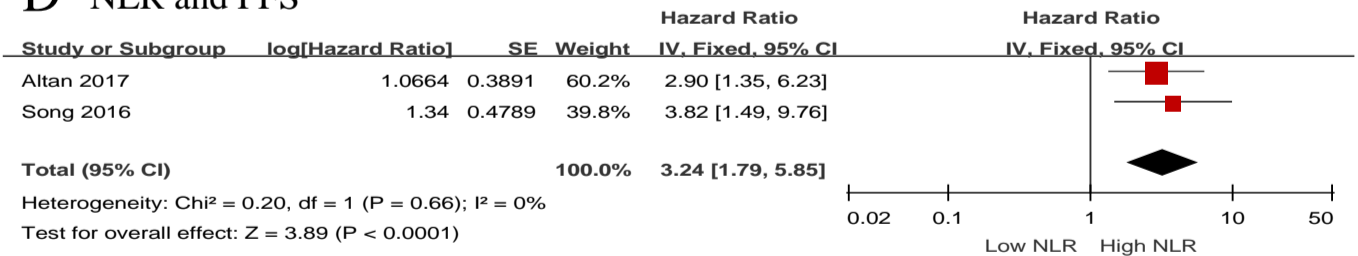

Supplement: 12957_2020_2048_MOESM4_ESM.pdf [file 12957_2020_2048_MOESM4_ESM.pdf]
