# Supplementary material for: Prognostic value of preoperative lymphocyte-related systemic inflammatory biomarkers in upper tract urothelial carcinoma patients treated with radical nephroureterectomy: a systematic review and meta-analysis
Source: PubMed Central journal article supplement (PMC7585317; doi:10.1186/s12957-020-02048-7), 2020-10-23

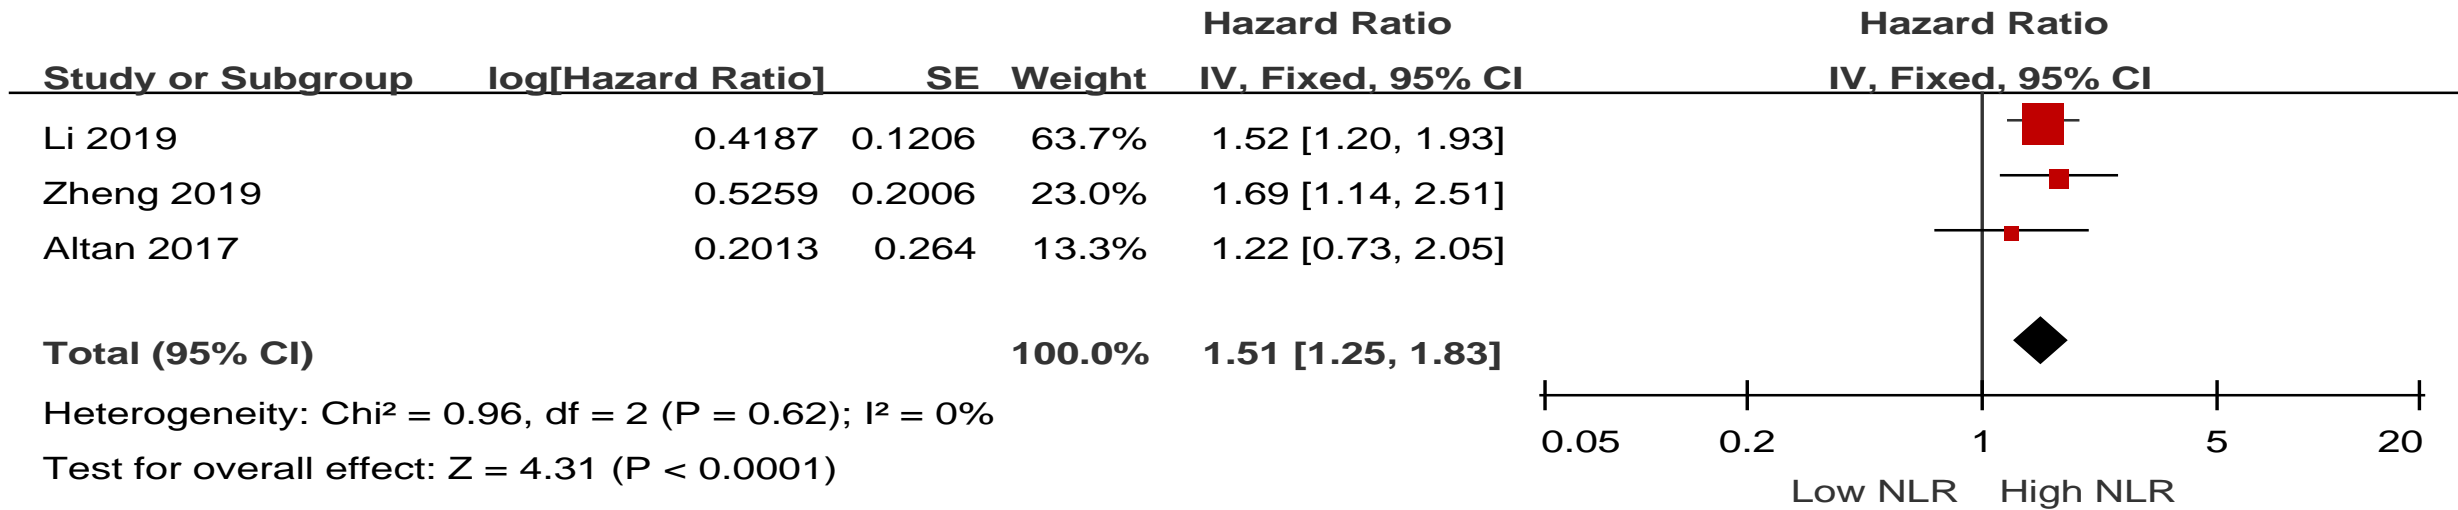

Supplement: 12957_2020_2048_MOESM7_ESM.pdf [file 12957_2020_2048_MOESM7_ESM.pdf]
